# Supplementary material for: A new potential mosquito-borne virus: detection of Human-derived Jingmenvirus in several-species of mosquitoes from Yaoundé, Cameroon
Source: Research Square preprint supplement (doi:10.21203/rs.3.rs-7347858/v1), 2025-09-09
Supplement: Supplementary file 1 [file d160c1f9fe537030ab3e4641.docx]

Supplementary Table 1 Name, accession numbers of the four consensus sequences generated from our different positive samples and comparison with the HaJV sequences of reference

| Name | Accession Number Genbank | % coverage of the reference | % identity | Reference Accession Number Genbank |
| --- | --- | --- | --- | --- |
| Jingmenvirus sp. Cameroon Mosquitoes MaJV1 segment1 | PV953369 | 93.6 | 98.9 | OQ835732 |
| Jingmenvirus sp. Cameroon Mosquitoes MaJV2 segment2 | PV953370 | 98.1 | 97.8 | OQ835733 |
| Jingmenvirus sp. Cameroon Mosquitoes MaJV3 segment3 | PV953371 | 96.7 | 96.6 | OQ835734 |
| Jingmenvirus sp. Cameroon Mosquitoes MaJV4 segment4 | PV953372 | 93.4 | 96.4 | OQ835735 |
